# Supplementary material
Source: Royal Society of Chemistry journal article supplement (doi:10.1039/d6ee00776g)
Supplement: d6ee00776g2.pdf [file d6ee00776g2.pdf]

# Supplementary Material

Mathis Landy, Oliver Schmidt, Nathan Johnson, Iain Staffell\*

Centre for Environmental Policy, Imperial College London, UK.

\* Corresponding author: [i.staffell@imperial.ac.uk](mailto:i.staffell@imperial.ac.uk)

## Appendix 1: Hybrid systems coupling technologies

Table 1: Advantages and drawbacks of coupling technologies for hybrid systems

|                      | Advantages                                                                                                                                                      | Drawbacks                                                                                                                                                                 |
|----------------------|-----------------------------------------------------------------------------------------------------------------------------------------------------------------|---------------------------------------------------------------------------------------------------------------------------------------------------------------------------|
| <b>AC coupled</b>    | <ul style="list-style-type: none"><li>- Good reliability</li><li>- Ready for grid connection</li><li>- Easy multi-voltage and multi-terminal matching</li></ul> | <ul style="list-style-type: none"><li>- Need for synchronised frequency over every component</li><li>- Need for power factor and harmonic distortion correction</li></ul> |
| <b>DC coupled</b>    | <ul style="list-style-type: none"><li>- No synchronisation needed</li><li>- Single wired connections</li></ul>                                                  | <ul style="list-style-type: none"><li>- Collapse of the whole system if bus or DC/AC inverter fail</li><li>- Concerns about voltage compatibility</li></ul>               |
| <b>DC/AC coupled</b> | <ul style="list-style-type: none"><li>- Higher overall efficiency</li><li>- Lower system cost</li></ul>                                                         | <ul style="list-style-type: none"><li>- Increased complexity in control and management of the system</li></ul>                                                            |

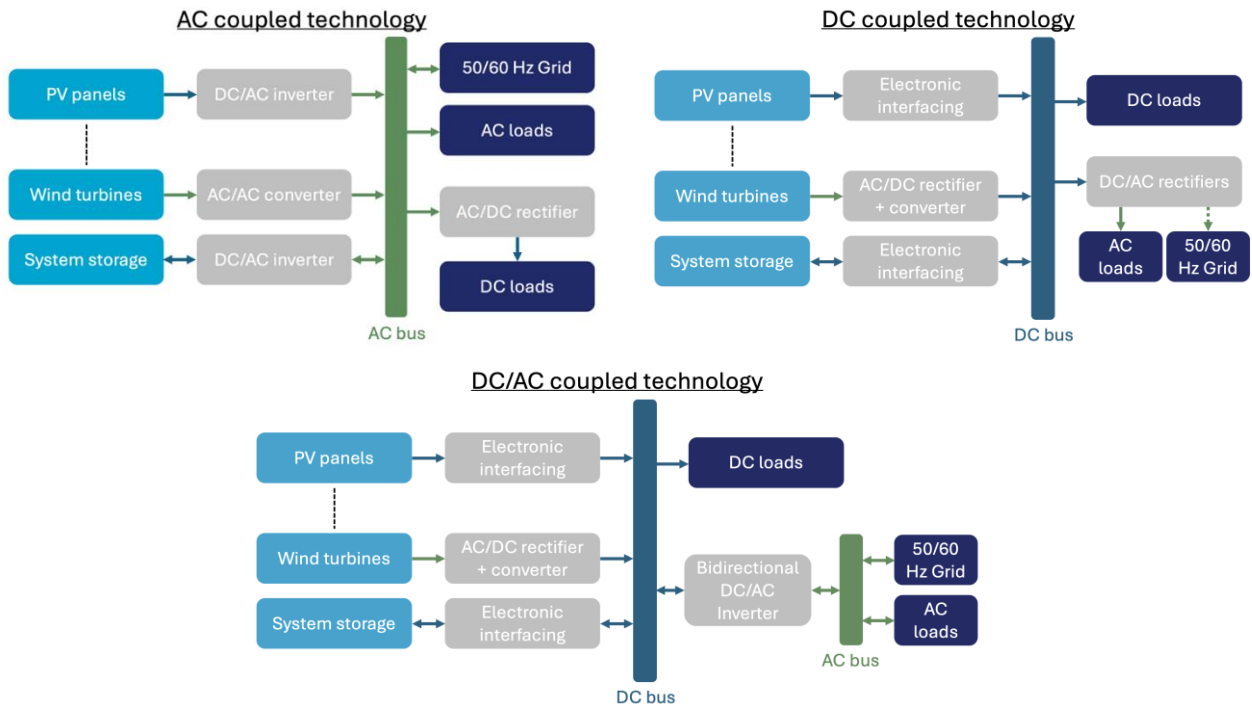

Figure 1: Description of the different coupling types

## Appendix 2: Policy and support for hybrid systems

Co-located projects require supportive policies and streamlined regulations to ensure feasibility. As of 2021, few studies addressed hybrid project regulations, with gaps in policy often hindering deployment due to varying rules for different assets <sup>1,2</sup>.

In the US, credits like the PTC and ITC target stand-alone solar or wind but overlook hybrids, while Germany's RES Act (EEG) focuses on renewable generation without addressing hybrid setups <sup>1</sup>. Spain's regulations allow storage integration into existing projects without new grid permits, though storage capacity is limited <sup>3</sup>.

In the UK, Ofgem's 2023 guidance grants hybrids access to support schemes like the Renewable Obligation, with further plans to allow storage co-location under Contracts for Difference <sup>4</sup>. Germany's 'Innovation Tenders' offer premiums for renewables-plus-storage projects, valuing their grid services <sup>5</sup>. Amid evolving policies, investors are increasingly exploring new types of Power Purchase Agreements (PPAs) to secure revenues for hybrid projects.

Co-located projects combining RES with storage can offer flexibility through three types of Hybrid PPAs <sup>6</sup>:

- **Renewable PPA with a Storage Capacity Agreement:** Involves a traditional PPA for the renewable asset and a capacity agreement for the storage system, which must be available during specified periods. Utilities may provide fixed payments for this availability, enhancing grid reliability.
- **Shaped Renewable PPA:** Combines renewable and storage assets in one agreement, allowing buyers to specify an hourly demand profile that the seller meets. Asset owners might also purchase positions on the open market.
- **Blended Renewable & Storage Premium PPA:** Integrates generation and storage, applying a premium to each electricity unit transferred, allowing for profile shaping and operational adjustments.

PPA type depends on asset location, operational specifics, and seller risk tolerance. Hybrid PPAs can combine revenues from ancillary services with traditional PPAs but require careful management <sup>6</sup>.

## Appendix 3: Optimisation methods

Table 2: Definition of key traditional methods with strengths and weaknesses <sup>7-11</sup>

| Probabilistic Method                                                                                                                                                                                                                                                                                                                  |                                                                                                                 |
|---------------------------------------------------------------------------------------------------------------------------------------------------------------------------------------------------------------------------------------------------------------------------------------------------------------------------------------|-----------------------------------------------------------------------------------------------------------------|
| Focuses on evaluating one or two system performance indicators while accommodating multi-objective functions and non-linear responses. Utilises long sequences of weather data, calculating probability density functions for power generation to account for variations in solar irradiance and wind speed <sup>8</sup> .            |                                                                                                                 |
| +                                                                                                                                                                                                                                                                                                                                     | -                                                                                                               |
| Easy to implement<br>Time-series data not needed                                                                                                                                                                                                                                                                                      | Not suitable for optimal solution finding<br>Can't present a dynamic effort                                     |
| Graphical Construction Method                                                                                                                                                                                                                                                                                                         |                                                                                                                 |
| Addresses optimisation problems with two variables by visually representing their interactions. Involves plotting constraint functions on the same chart and comparing the feasible region with the objective function contours <sup>9</sup> .                                                                                        |                                                                                                                 |
| +                                                                                                                                                                                                                                                                                                                                     | -                                                                                                               |
| Easy to understand<br>Low Complexity                                                                                                                                                                                                                                                                                                  | Lack of flexibility<br>Can't deal with high dimensional problems or too many variables                          |
| Iterative Method                                                                                                                                                                                                                                                                                                                      |                                                                                                                 |
| The evaluation criteria evolve until an optimal configuration is identified, yielding an approximate solution. Simulations continue on a computer until a termination criterion is met. Common iterative methods used include Hill Climbing, Dynamic Programming, Linear Programming, and Multi-objective Programming <sup>10</sup> . |                                                                                                                 |
| +                                                                                                                                                                                                                                                                                                                                     | -                                                                                                               |
| Easy to implement<br>Time-series data not needed                                                                                                                                                                                                                                                                                      | Unable to optimise specific attributes<br>High computing effort                                                 |
| Analytical Method                                                                                                                                                                                                                                                                                                                     |                                                                                                                 |
| Uses mathematical formulations and theoretical analysis to determine system characteristics and parameters, with a focus on economic viability. Typically relies on historical data to provide insights into trade-offs and constraints in decision-making processes <sup>7</sup> .                                                   |                                                                                                                 |
| +                                                                                                                                                                                                                                                                                                                                     | -                                                                                                               |
| Fast and easy to calculate<br>Provides a unique solution                                                                                                                                                                                                                                                                              | Requires long-term meteorological data<br>Limited degree of flexibility<br>Only two parameters can be optimised |

Repartition of the utilisation of AI algorithms (%)

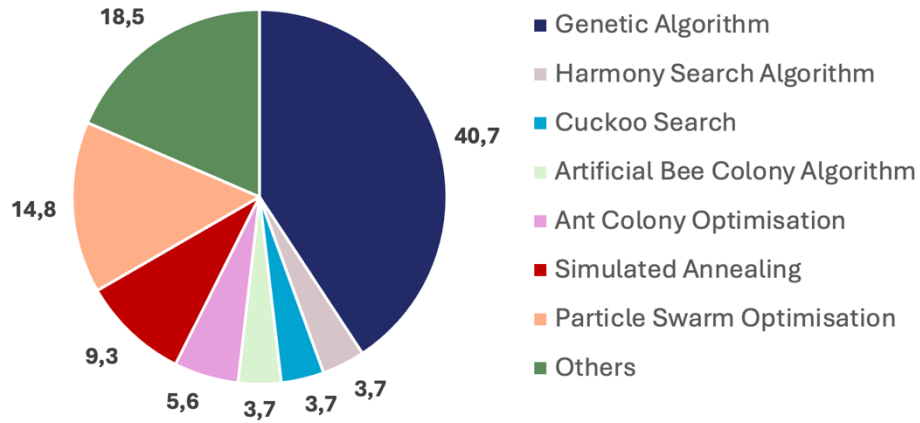

Figure 2: Proportion of key AI algorithms in the sizing of HRES. Source: <sup>12</sup>

Table 3: Inputs and Outputs of the main software tools for the design of HRES. Source: <sup>10</sup>

|                                          | HOMER | iHOGA | Hybrid2 | RETScreen | TRNSYS |
|------------------------------------------|-------|-------|---------|-----------|--------|
| <b>Inputs</b>                            |       |       |         |           |        |
| Load demand                              | ✓     |       | ✓       |           |        |
| Resources data                           | ✓     | ✓     | ✓       | ✓         | ✓      |
| Component data                           | ✓     | ✓     | ✓       |           |        |
| Constraints                              | ✓     | ✓     |         |           |        |
| Controlling a system                     | ✓     |       |         | ✓         |        |
| Data on emissions                        | ✓     | ✓     |         | ✓         |        |
| Data on the economy                      | ✓     | ✓     |         |           |        |
| Financial information                    | ✓     |       | ✓       |           |        |
| Models taken from own collection         | ✓     |       |         |           | ✓      |
| <b>Outputs</b>                           |       |       |         |           |        |
| Size optimisation                        | ✓     | ✓     | ✓       | ✓         |        |
| Technical evaluation                     | ✓     | ✓     | ✓       | ✓         | ✓      |
| Financial assessment                     | ✓     | ✓     | ✓       | ✓         |        |
| Environmental analysis                   | ✓     |       |         | ✓         |        |
| Multi-objective optimisation             | ✓     | ✓     |         |           |        |
| Life-cycle emissions                     | ✓     | ✓     |         | ✓         |        |
| Analytical probability                   | ✓     | ✓     |         | ✓         |        |
| Risk assessment and sensitivity analysis | ✓     |       |         | ✓         | ✓      |

## Appendix 4: Evaluation criteria

Table 4: Evaluation criteria used in the literature for the optimisation of HRES. Source: <sup>7,8,11</sup>

| Evaluation criteria                            | Description                                                                                 | Equation                                                                              |
|------------------------------------------------|---------------------------------------------------------------------------------------------|---------------------------------------------------------------------------------------|
| <b>Reliability</b>                             |                                                                                             |                                                                                       |
| <b>Loss of Load Expected (LOLE)</b>            | Average number of hours when the load is expected to be higher than the generation capacity | $LOLE = \sum_{h=1}^H \sum_{i \in S} P_i \times T_i$                                   |
| <b>Loss of Load Probability (LOLP)</b>         | Ratio of the total energy deficit to the load demand over a specific period                 | $LOLP = \frac{\sum_{h=1}^H ES(h)}{\sum_{h=1}^H LD(h)}$                                |
| <b>Loss of Energy Expected (LOEE)</b>          | Expected value of energy that has not been provided                                         | $LOEE = \sum_{h=1}^H \sum_{i \in S} P_i \times LOE_i$                                 |
| <b>Loss of Power Supply Probability (LPSP)</b> | Probability that an inability to meet load demand results in a power shortage               | $LPSP = \frac{LOEE}{\sum_{h=1}^H LD(h)}$                                              |
| <b>Economic</b>                                |                                                                                             |                                                                                       |
| <b>Levelized Cost of Energy (LCOE)</b>         | Unit cost of energy                                                                         | $LCOE = \frac{\text{Discounted total cost}}{\text{Discounted total energy produced}}$ |
| <b>Life Cycle Cost (LCC)</b>                   | Net Present Value sum of all costs                                                          | $LCC = C + OM_{npv} + R_{npv} - S_{npv}$                                              |
| <b>Annualized cost of the system (ACS)</b>     | Annual cost of the system including capital cost, O&M cost, fuel cost, and replacement cost | $ACS = C_{a,cap} + C_{a,O\&M} + C_{a,fuel} + C_{a,rep}$                               |
| <b>Net Present Cost (NPC)</b>                  | Difference between the present value of cash outflows and cash inflows                      | $NPC = ACS \times CRF$                                                                |
| <b>Environmental</b>                           |                                                                                             |                                                                                       |
| <b>Carbon Footprint of Energy (CFOE)</b>       | Total amount of emissions per unit of energy generated during the system lifetime           |                                                                                       |

$CRF$  corresponds to the Capital Recovery Factor and is linked to the discount rate by the following equation:

$$CRF = \frac{r(1+r)^n}{(1+r)^n - 1} \quad (1)$$

Where  $r$  represents the discount rate and  $n$  the project lifetime.

Table 5: Review of methods used and characteristics of renewables-plus-storage found in the literature.

| Sizing method              | Energy sources              | SA / GC | Indicators                | Objective functions           | Reference |
|----------------------------|-----------------------------|---------|---------------------------|-------------------------------|-----------|
| <b>Traditional methods</b> |                             |         |                           |                               |           |
| <b>Graphical</b>           | PV/WT/Battery               | SA      | Economic                  | Minimise cost                 | 13        |
|                            | PV/WT/Hydrogen              | SA/GC   | Economic<br>Environmental | Minimise cost and emissions   | 14        |
| <b>Iterative</b>           | PV/WT/Battery               | SA      | Economic                  | Minimise LCOE                 | 15        |
|                            | PV/WT/Battery               | SA      | Reliability               | Minimise LPSP                 | 16        |
|                            | PV/Biomass/Battery          | SA      | Economic                  | Minimise total cost           | 17        |
| <b>Probabilistic</b>       | PV/WT/Battery               | SA      | Reliability               | Maximise reliability          | 18        |
|                            | WT/Battery                  | SA      | Reliability               | Maximise reliability          | 19        |
|                            | PV/WT/Battery               | SA/GC   | Reliability               | Minimise LPSP                 | 20        |
|                            | PV/WT                       | SA/GC   | Economic                  | Minimise cost                 | 21        |
|                            | PV/Battery/DG/Hydrogen      | GC      | Economic                  | Maximise NPV                  | 22        |
| <b>Analytical</b>          | PV/WT/Battery               | SA      | Technical<br>Economic     | Minimise LCOE                 | 23        |
|                            | PV                          | SA      | Reliability<br>Technical  | Minimise LOLP, Capacity of PV | 24        |
|                            | PV/WT                       | GC      | Economic                  | Minimise LCOE                 | 25        |
|                            | PV/WT/Battery               | SA      | Economic                  | Minimise cost                 | 26        |
|                            | PV                          | SA      | Economic                  | Minimise PBP                  | 27        |
|                            | PV/Battery/Seasonal storage | SA/GC   | Economic<br>Environmental | Minimise cost and emissions   | 28        |
|                            | PV/Battery/Seasonal storage | SA/GC   | Economic<br>Environmental | Minimise cost and emissions   | 29        |

# Appendix 5: Methodology Details

## Data collection

This section outlines the strategy employed for gathering the various types of information required for the optimisation model computations.

Data collection was necessary for the parameters input in the model, which include the characteristics of the renewable assets, storage system, hybrid system coupling, as well as project details and financial/cost parameters. These data were gathered from various sources, including academic papers, company websites, and interviews. Specifically, storage system costs and efficiencies were obtained through a benchmarking process based on data provided by interviewees. This approach allowed for a comparison between literature-based data and real-world modelling insights.

The electricity production data for the renewable assets was retrieved using the API provided by the Renewables.ninja platform <sup>30,31</sup>. This API enables the download of hourly power outputs for wind or solar farms, based on the input parameters specified in Table 6 as an example. These parameters correspond to the Lyneham Solar Farm site, reflecting the characteristics used in this study.

*Table 6: Solar production characteristics entered in Renewables.ninja*

| Parameter                                  | Value                   |
|--------------------------------------------|-------------------------|
| <b>Latitude, Longitude of the location</b> | 51.509, -2.0            |
| <b>Installed renewable capacity</b>        | 1 MW                    |
| <b>Period of time considered</b>           | 01/01/2023 – 31/12/2023 |
| <b>System parameters</b>                   |                         |
| - System loss                              | 0                       |
| - Tilt angle                               | 35                      |
| - Azimuth angle                            | 180                     |

For modelling purposes, the capacity is fixed at 1 MW and later scaled by the actual renewable capacity in the model. The system loss is set to 0, as losses are already accounted for within the model.

Electricity price data for the various markets considered in this study was collated over the period from 2019 to 2023 from various market operators, as detailed in <sup>32</sup>. Additionally, data on the volumes required by the system operator for BM and DC markets was gathered through the publicly available sources of ESO <sup>33</sup> and ModoEnergy API <sup>34</sup>.

## Data cleaning

The goal of the data cleaning algorithm was to standardise the data and generate half-hourly inputs suitable for processing by the optimisation model. The different phases of the cleaning process are described as follows:

- **Fill in Missing Values:** Missing values were addressed through linear interpolation, using preceding and succeeding values to estimate and complete the gaps.
- **Date and Time Treatment:** The electricity price data contained dates in various formats. All files were standardised to the format '%Y-%m-%d %H:%M:%S'.
- **Local Time vs. Global Time:** While electricity price files were using local time for their data, renewable production was put under UTC time zone. To adjust the data to local time, values at the beginning and the end of the year were inverted to have a file going from 01-01 00:00 to 12-31 23:00.
- **Time interval Resampling:** Both electricity price and renewable production data were resampled to 30-min time intervals using linear interpolation if necessary.
- **Power Unit Conversion:** Renewable energy production was collected as kilowatts. Data was converted to Megawatts to ensure consistent unit with the rest of the programming.
- **Time Period Filtering:** Data was then filtered between the start date and the end date wanted and inputted for the simulation.

This algorithm is subsequently called by the optimisation model during the simulation and returns a Pandas DataFrame, which is then used as an input for the optimisation process.

## Half-hourly data computation

This section presents an example of WS prices and renewable production data for the Lyneham Solar Farm case study and the year 2023.

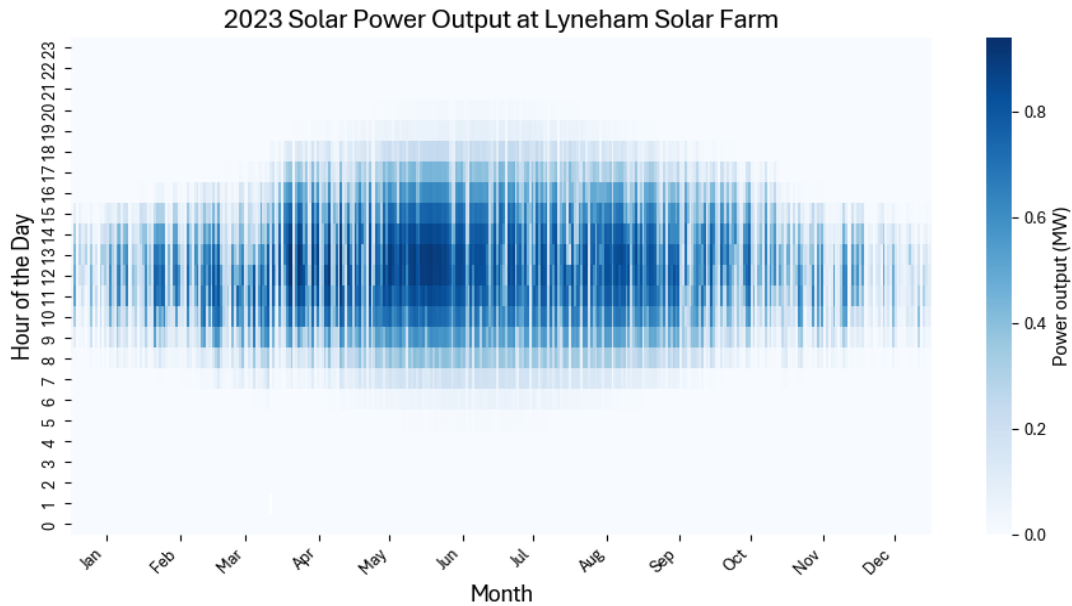

Figure 3: Solar power output of a 1 MW solar farm at the site selected for the year 2023

Figure 3 illustrates the hourly solar power output for the Lyneham Solar Farm throughout the entire year of 2023. Similarly, Figure 4 depicts the UK day-ahead electricity prices for each hour of the day throughout the entire year.

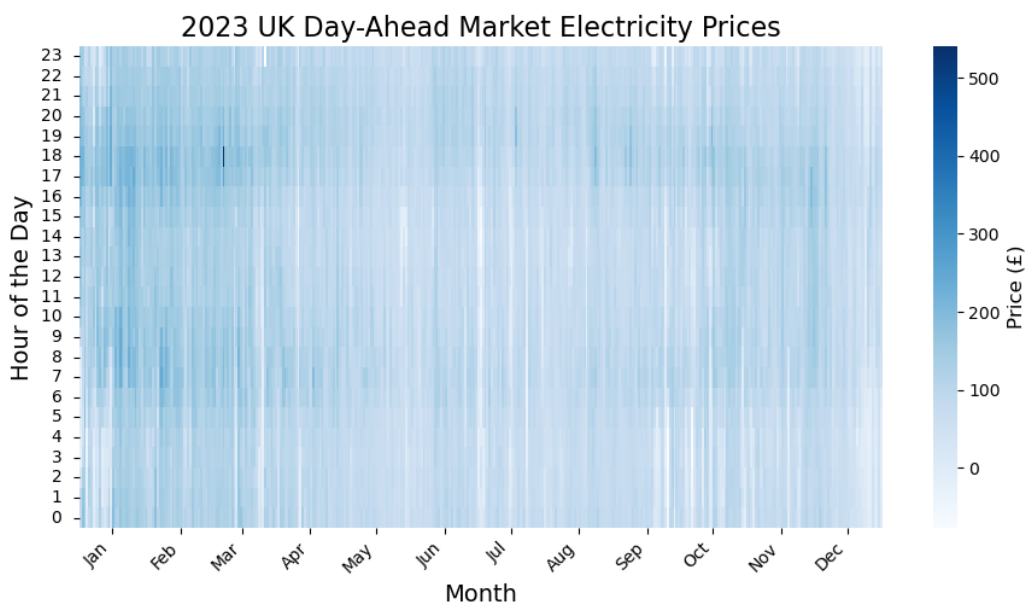

Figure 4: Electricity prices in the market of the site selected throughout the year 2023

Finally, Figure 5 illustrates the frequency of electricity prices across different intervals. It shows that the most common interval is £80-100/MWh, while the majority of prices fall within the range of £60-120/MWh. In addition to these prices, negative prices were observed for 43 hours in 2023.

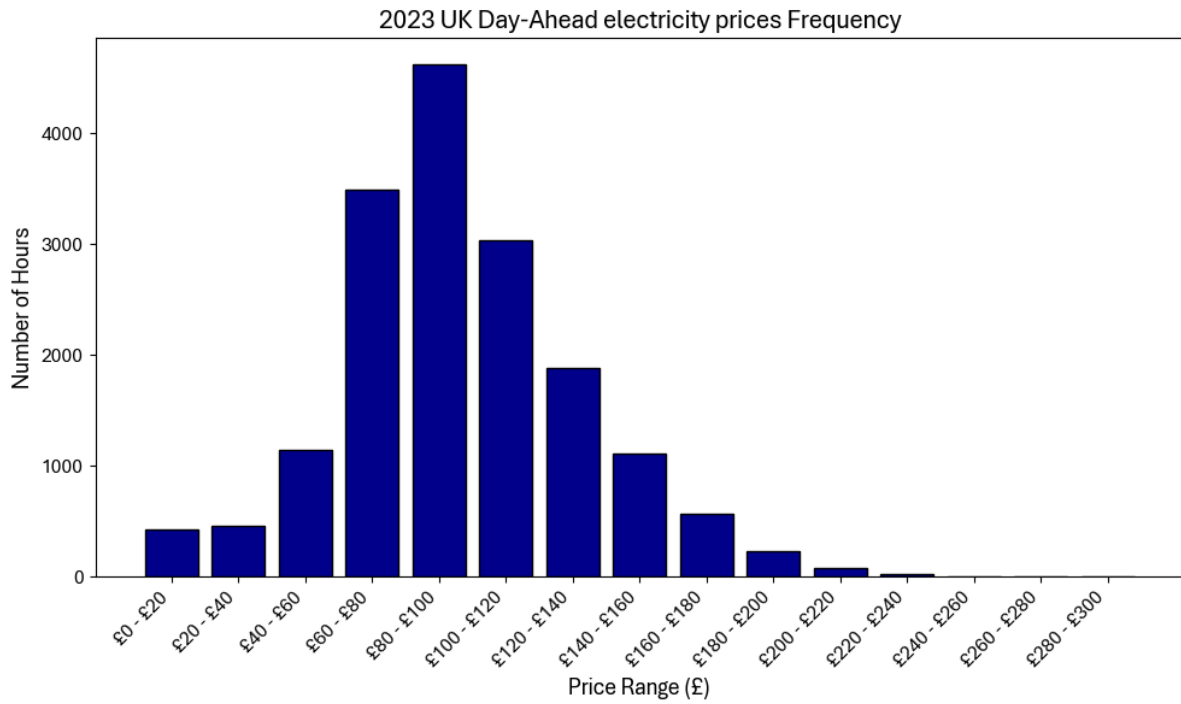

Figure 5: Frequency of UK WS electricity prices in 2023

## Parameters data description

Table 7: Details of parameters alongside the values used and their sources

| Description                               | Value  | Unit    | Source     |
|-------------------------------------------|--------|---------|------------|
| Storage charging efficiency               | 0.93   |         | 32         |
| Storage discharging efficiency            | 0.93   |         | 32         |
| DC-DC connection efficiency               | 0.99   |         | 35         |
| DC-AC connection efficiency               | 0.95   |         | 35         |
| AC-AC connection efficiency               | 0.98   |         | 35         |
| AC-DC connection efficiency               | 0.95   |         | 35         |
| Proportion of DCL reserve activated       | 0.1    |         | Interviews |
| Proportion of DCH reserve activated       | 0.1    |         | Interviews |
| Variable O&M cost of the storage system   | 0      | £/MWh   | 36         |
| Variable O&M cost of the solar production | 0      | £/MWh   | 36         |
| Variable O&M cost of the wind production  | 0      | £/MWh   | 36         |
| Storage depth-of-discharge                | 0.8    |         | 32         |
| Storage self-discharge                    | 0.0002 | Per day | 37         |
| Storage calendar lifetime                 | 13     | years   | 37         |
| Storage cycle lifetime                    | 4,500  | cycles  | 37         |
| Allowed cycles per day                    | 2      |         | 38         |
| Solar fixed operational cost              | 15,400 | £/MW/yr | 39         |
| Wind fixed operational cost               | 25,400 | £/MW/yr | 39         |
| Grid connection cost                      | 67,250 | £/MW    | Interviews |
| Time sensitivity of the data              | 0.5    | hours   | –          |
| Number of time steps                      | 17,520 |         | –          |
| Project duration                          | 20     | years   | 40         |
| Discount rate of the project              | 0.08   |         | 40         |

Operational and capital costs for the storage system were initially gathered through interviews and subsequently cross-referenced with publicly available data to ensure accuracy. These costs, expressed in 2023 £, represent overnight costs for the system. They are provided below:

Table 8: Storage system capital and operational costs

| Costs                         | 1 hr    | 2 hrs   | 4 hrs   |
|-------------------------------|---------|---------|---------|
| Storage system CAPEX (£/MW)   | 249,185 | 387,408 | 605,134 |
| Storage system OPEX (£/MW/yr) | 4,720   | 6,740   | 10,785  |

Using the GNESTE database <sup>39</sup>, the study gathered and applied continent-specific capital costs for solar and wind farms summarised below:

Table 9: Solar and wind capital costs considered per continent

| Costs                   | Europe    | North America | Oceania   |
|-------------------------|-----------|---------------|-----------|
| Solar farm CAPEX (£/MW) | 746,440   | 918,450       | 785,890   |
| Wind farm CAPEX (£/MW)  | 1,342,960 | 1,240,390     | 1,339,000 |

## Scenario variables

The scenario variables outlined below enable the modelling of various project configurations. They allow for adjustments to the type of renewable assets and their revenue models, the coupling and coordination of the assets, and the operational strategies of the storage system. Additionally, these variables provide the option to either optimise the renewable capacity or keep it fixed.

Table 10: List of variables for scenario configuration

| Symbol                                    | Description                                                                                                                |
|-------------------------------------------|----------------------------------------------------------------------------------------------------------------------------|
| <b><i>Generation<sub>type</sub></i></b>   | List indicating the type of RES assets involved:<br>[‘solar’] or [‘wind’] or [‘solar’, ‘wind’]                             |
| <b><i>Coupling<sub>type</sub></i></b>     | List of booleans specifying the type of coupling between the assets:<br>[‘AC coupling’, ‘DC coupling’, ‘DC-AC coupling’]   |
| <b><i>Fixed_price<sub>RES</sub></i></b>   | The asset operates as a full merchant if the variable is set to 0, or under a fixed price contract if set to another value |
| <b><i>Bool<sub>opti_RES</sub></i></b>     | Indicates whether the RES capacity is optimised ( <i>True</i> ) or fixed ( <i>False</i> )                                  |
| <b><i>Bool<sub>coord_assets</sub></i></b> | Specifies if the assets coordinate their operations ( <i>True</i> ) or not ( <i>False</i> )                                |
| <b><i>Bool<sub>grid_chg</sub></i></b>     | Indicates if the system can charge from the grid ( <i>True</i> ) or not ( <i>False</i> )                                   |
| <b><i>Bool<sub>BM</sub></i></b>           | Allows participation in BM market ( <i>True</i> if allowed, <i>False</i> if not)                                           |
| <b><i>Bool<sub>DC</sub></i></b>           | Allows participation in DC market ( <i>True</i> if allowed, <i>False</i> if not)                                           |

The following equations calculate the different efficiencies as a function of the type of coupling. Eq. (2) and Eq. (3) correspond to an AC coupling of the assets:

$$\left\{ \begin{array}{l} \eta_{so-g} = \eta_{DC-AC} \\ \eta_{w-g} = \eta_{AC-AC} \\ \eta_{st-g} = \eta_{DC-AC} \end{array} \right. \quad \left\{ \begin{array}{l} \eta_{so-st} = \eta_{DC-AC} * \eta_{AC-DC} \\ \eta_{w-st} = \eta_{AC-AC} * \eta_{AC-DC} \\ \eta_{g-st} = \eta_{AC-DC} \end{array} \right. \quad (2)$$

However, if the assets are DC-coupled or DC-AC coupled, the equations become:

$$\left\{ \begin{array}{l} \eta_{so-g} = \eta_{DC-DC} * \eta_{DC-AC} \\ \eta_{w-g} = \eta_{AC-DC} * \eta_{DC-AC} \\ \eta_{st-g} = \eta_{DC-DC} * \eta_{DC-AC} \end{array} \right. \quad \left\{ \begin{array}{l} \eta_{so-st} = \eta_{DC-DC} * \eta_{DC-DC} \\ \eta_{w-st} = \eta_{AC-DC} * \eta_{DC-DC} \\ \eta_{g-st} = \eta_{AC-DC} * \eta_{DC-DC} \end{array} \right. \quad (3)$$

## Appendix 6: Economic indicators formulations

Table 11 presents the equations for traditional indicators, along with the relevant parameters considered.

Table 11: Definition of key financial indicators. Source: <sup>41</sup>

| Indicator   | Equation                                                                                                                                                                                           | Nomenclature                                                                                                                                                                                                                                                                                            |
|-------------|----------------------------------------------------------------------------------------------------------------------------------------------------------------------------------------------------|---------------------------------------------------------------------------------------------------------------------------------------------------------------------------------------------------------------------------------------------------------------------------------------------------------|
| <b>NPV</b>  | $NPV = \sum_{t=0}^N \frac{CF_t}{(1+r)^t}$ <p>Quantifies creation of monetary value - Profitable if NPV &gt; 0</p>                                                                                  | <p><math>N</math>: Project lifetime</p> <p><math>CF_t</math>: Cash Flow for the year <math>t</math></p> <p><math>r</math>: Annual discount rate</p>                                                                                                                                                     |
| <b>IRR</b>  | $0 = \sum_{t=0}^N \frac{CF_t}{(1+IRR)^t}$ <p>Quantifies creation of value as a rate of return - Profitable if IRR &gt; k<br/>k: discount rate threshold</p>                                        | <p><math>I</math>: Initial investment</p> <p><math>Np</math>: Number of years before recovering the investment</p>                                                                                                                                                                                      |
| <b>PBP</b>  | $PBP = \frac{I}{\sum_{t=1}^{Np} \frac{CF_t}{(1+r)^t}}$ <p>Number of years to recover the investment - Profitable if PBP &lt; threshold</p>                                                         | <p><math>Capital_t</math>: Capital costs in the year <math>t</math></p> <p><math>O\&amp;M_t</math>: Operation and maintenance costs in the year <math>t</math></p> <p><math>F_t</math>: Fuel costs in the year <math>t</math></p> <p><math>Carbon_t</math>: Carbon costs in the year <math>t</math></p> |
| <b>LCOE</b> | $LCOE = \frac{\sum_{t=0}^N (Capital_t + O\&M_t + F_t + Carbon_t + D_t)(1+r)^{-t}}{\sum_{t=0}^N E_t (1+r)^{-t}}$ <p>Assesses the unit cost of energy - Used to compare projects or technologies</p> | <p><math>D_t</math>: Decommissioning and waste management costs in the year <math>t</math></p>                                                                                                                                                                                                          |
| <b>ROI</b>  | $ROI = \frac{\sum_{t=0}^N CF_t}{N * I} \times 100$ <p>Ratio between average yearly cash flow and initial investment</p>                                                                            |                                                                                                                                                                                                                                                                                                         |

## Appendix 7: Optimisation example

As discussed in previous sections, the algorithm optimises asset operations to maximise revenues. It evaluates the state of each energy flow every half-hour and calculates the corresponding costs or revenues. Figure 6 below illustrates the optimised operations for a day when a 100 MW storage system is co-located with a 100 MW solar farm. The model allows participation in all considered markets, and the storage system has the capability to charge from the grid. The operations are presented alongside the storage system's energy level and the corresponding electricity prices.

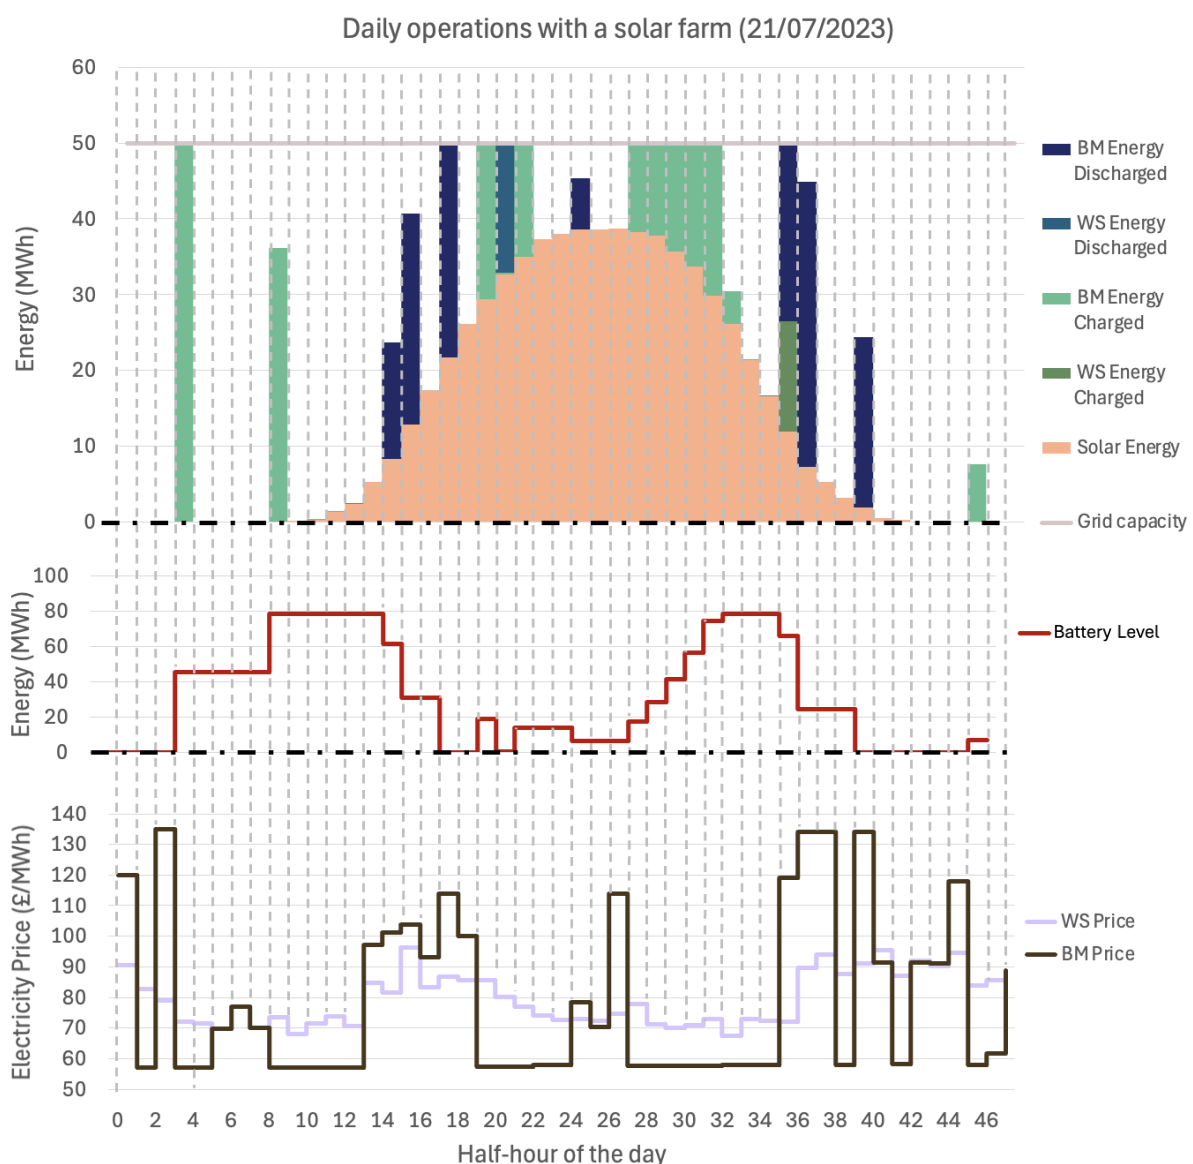

Figure 6: Daily operations of a co-located project alongside storage energy level and electricity prices

During certain time intervals, no operations occur even though they could have. This is because the storage system's daily cycles are limited to minimise degradation. It can be observed that storage discharge primarily occurs during peak hours in the morning and evening, while charging typically takes place at night and during the day when electricity prices are lower.

The sizing optimisation determines the optimal configuration by simulating the control strategy for each given capacity. The incremental approach and convex optimisation methods are applied to a storage system participating in both WS and BM markets, while charging from the grid and operating in conjunction with a 100 MW solar farm on a 100 MW grid connection. Results are outlined in Figure 7.

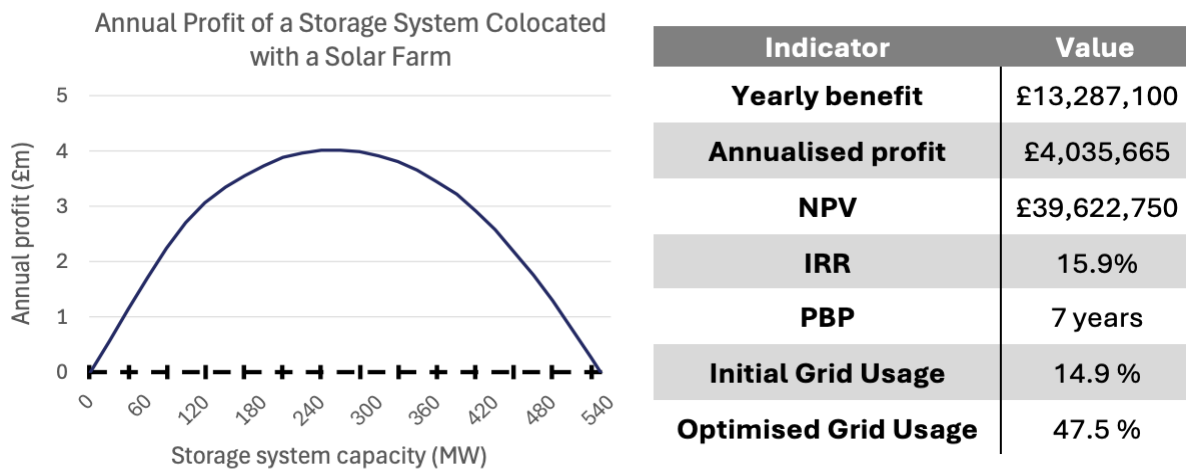

Figure 7: Annual profit for various storage system capacities co-located with a solar farm, with a table of the optimal indicators for a co-located project with a 100 MW solar farm

The optimal storage capacity is determined to be 252 MW, which maximises the annualised profit. This profit represents the yearly benefits after deducting the various annualised capital costs. The maximum annualised profit is £4,035,665 per year.

For this configuration, the two convex optimisation approaches were tested to determine the most efficient option. Figure 8 compares the optimised storage capacity and the computation times for both methods, with tolerance values ranging from 20 MW to 1 MW. Dichotomy method proves to be the faster algorithm for the sizing optimisation. Consequently, it has been used for the simulations presented in the Results section.

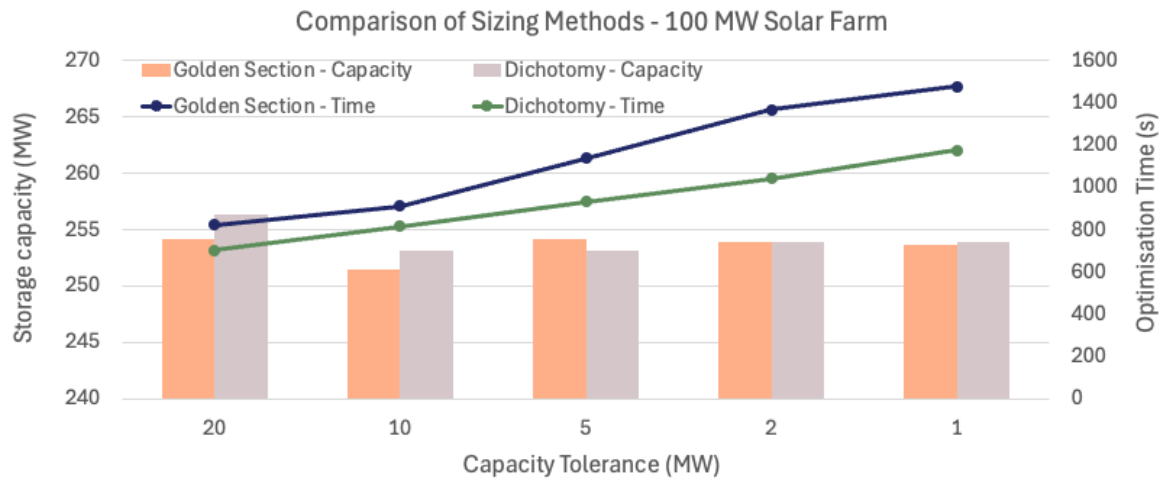

Figure 8: Comparison of optimisation methods for the storage system sizing depending on the tolerance accepted

## Appendix 8: UK Results – Annual profit details for wind co-located projects

Profits for co-located projects with solar farms are discussed in detail in the main section. Figure 9 presents the profit analysis for a wind farm equipped with a 1-hour storage system, which has an optimal capacity of 168 MW. Despite a reduction in system costs, co-location with wind farms results in lower operations on the WS market, leading to a decreased total profit. However, overall patterns remain quite similar between co-located solar and wind projects.

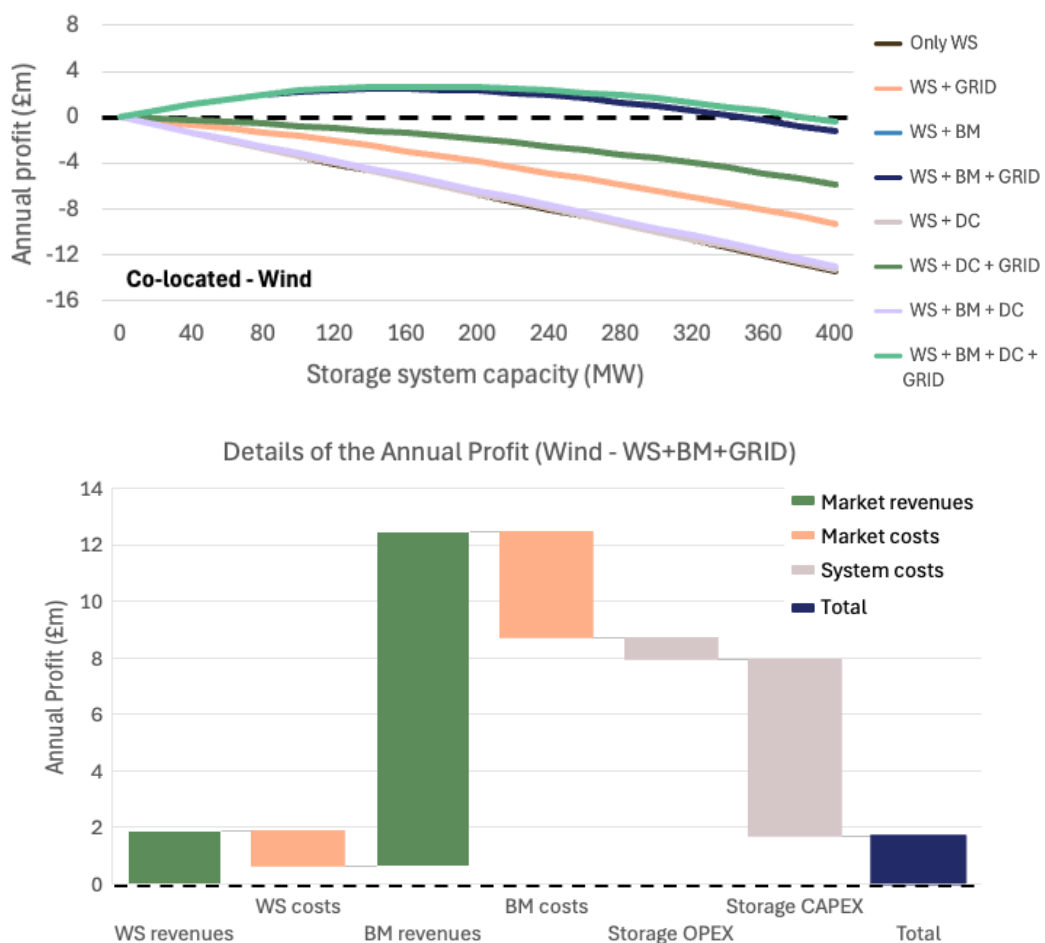

Figure 9: Annual profits for storage co-located with wind when participating in various markets. (a) Profits from each combination of markets at various capacities participations and storage capacities and (b) breakdown of revenues (from discharging) and costs (from charging) for each market at the optimal storage capacity.

## Appendix 9: UK Results – Impact of the discharge duration on co-located projects with wind farms

As explained in Section **Error! Reference source not found.**, the impact of the storage system’s discharge duration on the economic viability of co-located projects can be analysed similarly for both solar and wind projects. Figure 10 outlines the potential profits generated by a storage system co-located with a wind farm for various capacities and discharge durations ranging from 1 to 6 hours.

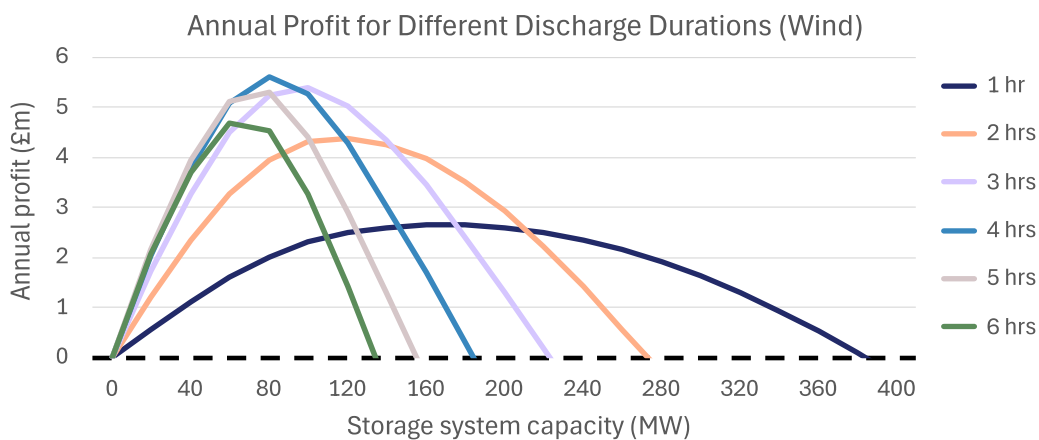

Figure 10: Annual profit for different discharge durations of the storage system when co-located with a wind farm

Figure 11 illustrates the revenues generated by a storage system with optimal power capacity for each discharge duration when co-located with a wind farm.

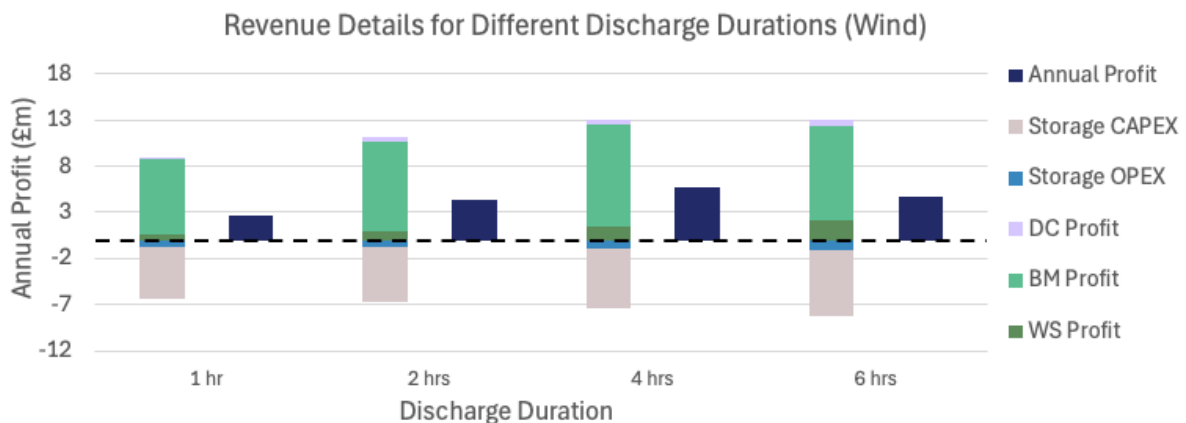

Figure 11: Annual profit details for different discharge durations of the storage system in co-location with a wind farm

## Appendix 10: UK Results – Renewable-to-Grid Ratio: Complementary Analysis for Co-Located Projects

Section **Error! Reference source not found.** also discussed the optimal Renewable-to-Grid ratio for co-locating storage systems, using examples of weekly operations to demonstrate how variations in renewable energy types influence the outcomes. To validate this analysis, Table 12 and Table 13 summarise the energy flows of the storage system across different ratios, considering co-location with solar farms and wind farms, respectively.

Table 12: Energy flows of the storage system for co-located projects with a solar farm and different solar-to-grid ratios

| Solar-to-Grid Ratio | WS Market    |                 | BM Market    |                 | Solar-to-Storage |
|---------------------|--------------|-----------------|--------------|-----------------|------------------|
|                     | Charge (GWh) | Discharge (GWh) | Charge (GWh) | Discharge (GWh) | Charge (GWh)     |
| 0.4                 | 28.9         | 33.8            | 150.1        | 137.4           | 0.075            |
| 1.2                 | 25.2         | 28.0            | 123.6        | 115.3           | 0.532            |
| 2                   | 25.6         | 38.2            | 108.1        | 119.8           | 30.6             |

Table 13: Energy flows of the storage system for co-located projects with a wind farm and different wind-to-grid ratios

| Wind-to-Grid Ratio | WS Market    |                 | BM Market    |                 | Wind-to-Storage |
|--------------------|--------------|-----------------|--------------|-----------------|-----------------|
|                    | Charge (GWh) | Discharge (GWh) | Charge (GWh) | Discharge (GWh) | Charge (GWh)    |
| 0.4                | 27.5         | 34.4            | 117.8        | 107.1           | 0.217           |
| 1.2                | 14.1         | 18.4            | 77.7         | 69.1            | 1.34            |
| 2                  | 6.95         | 14.0            | 42.9         | 38.5            | 6.32            |



# Appendix 11: UK Results – Market Participation Scenarios for Full Hybrid Projects with Wind Farm

While Section **Error! Reference source not found.** analyses the impact of multiple market participation on the annual profit of full hybrid projects, it primarily focuses on solar farms. Figure 12 presents the annual profit for full hybrid projects co-located with a wind farm, revealing a similar pattern to that of solar projects, but with higher generated profits.

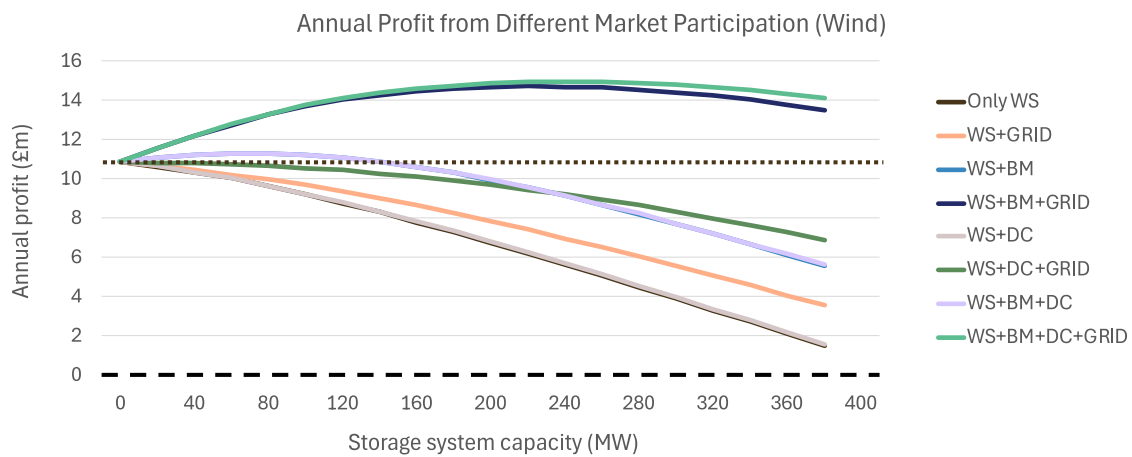

Figure 12: Annual profit computation for different market participation – Full hybrid projects with a wind farm

## Appendix 12: UK Results – Impact of the Location: North and South Site Selection

This section evaluates how asset location affects optimisation results, particularly the impact of the renewable asset's capacity factor on storage system sizing and economic indicators. Two UK sites were selected to isolate location effects: one in the south and the other in the north. Table 14 and Figure 13 outline their key characteristics and a map of the locations.

Table 14: Characteristics of selected sites for the study of the location impact.

|                                   | South          | North               |
|-----------------------------------|----------------|---------------------|
| <b>Location Name</b>              | Eveley Farm    | Milltown Solar Farm |
| <b>Latitude; Longitude</b>        | 51.098; -1.533 | 57.673; -3.235      |
| <b>Altitude (m)</b>               | 76             | 6                   |
| <b>2023 Solar Capacity Factor</b> | 15.6%          | 13.4%               |
| <b>2023 Wind Capacity Factor</b>  | 37.5%          | 39.5%               |

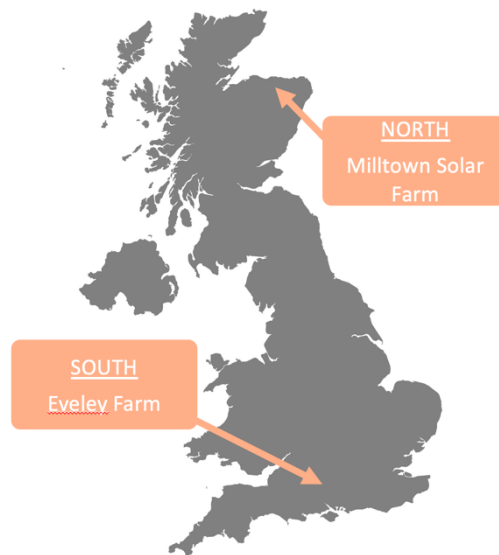

Figure 13: UK location for the two sites considered in the study of the location impact.

Solar farms have a higher capacity factor in the south, while wind farms perform better in the north, with a noticeable 2% difference for both types. Simulations determined the optimal storage capacity for a 100 MW renewable asset and grid connection, analysing both Co-

located and Full Hybrid projects. Figure 14 presents results for both solar and wind scenarios.

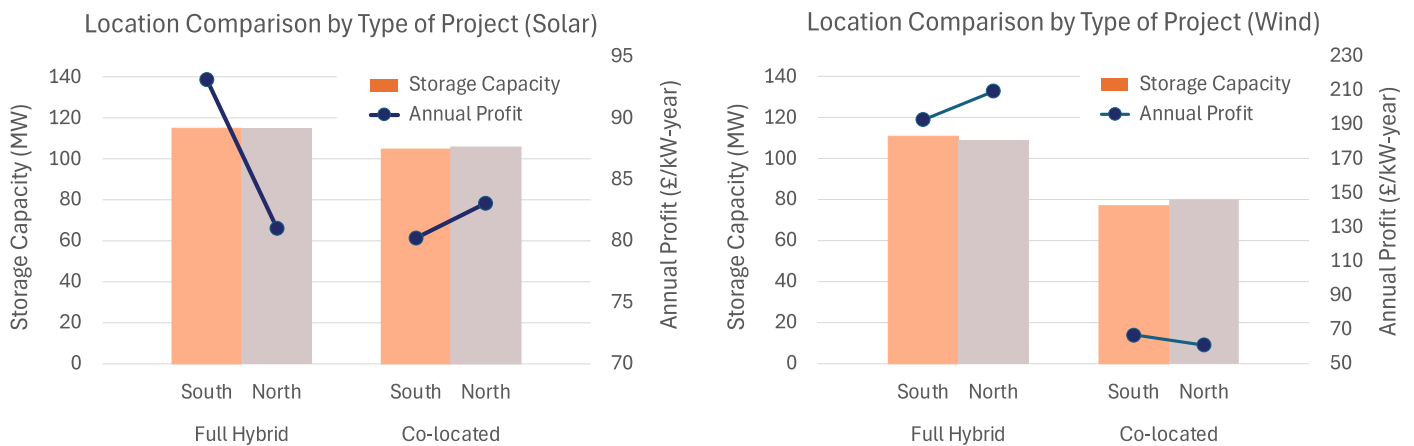

Figure 14: Optimal storage capacities and corresponding profits for the two locations, the two types of projects and the two renewable asset types

For both renewable assets, we observe contrasting outcomes between a Full Hybrid and a Co-located project. In a solar project, the Full Hybrid model generates higher profits in the southern regions of the country. Conversely, a storage developer maximises own profits in the north. The profit difference is more pronounced in Full Hybrid projects, especially for solar farms.

Table 15 and Table 16 present the initial and optimal indicators for Full Hybrid projects located in the southern and northern regions of the country, respectively for solar farms and wind farms.

Table 15: Comparison of indicators for stand-alone solar farms and full hybrid projects

|                     | Stand-alone solar farm indicators |             | Full hybrid project Indicators |             |
|---------------------|-----------------------------------|-------------|--------------------------------|-------------|
|                     | South                             | North       | South                          | North       |
| <b>IRR</b>          | 9.22%                             | 6.86%       | 16.5%                          | 15.5%       |
| <b>NPV</b>          | £8,152,000                        | -£7,350,500 | £105,199,000                   | £91,562,000 |
| <b>PBP</b>          | 15                                | 21          | 7                              | 8           |
| <b>Capture Rate</b> | 93.9%                             | 93.0%       | 97.3%                          | 96%         |
| <b>Grid Usage</b>   | 15.2%                             | 12.8%       | 62.0%                          | 61.1%       |

Table 16: Comparison of indicators for stand-alone wind farms and full hybrid projects

|                     | Stand-alone wind farm indicators |              | Full hybrid indicators |              |
|---------------------|----------------------------------|--------------|------------------------|--------------|
|                     | South                            | North        | South                  | North        |
| <b>IRR</b>          | 20.4%                            | 21.8%        | 20.9%                  | 21.8%        |
| <b>NPV</b>          | £136,792,000                     | £152,959,000 | £210,185,000           | £224,267,000 |
| <b>PBP</b>          | 6                                | 6            | 6                      | 6            |
| <b>Capture Rate</b> | 96.8%                            | 102.4%       | 100.7%                 | 106.3%       |
| <b>Grid Usage</b>   | 39.0%                            | 38.8%        | 72.9%                  | 72.7%        |

## Appendix 13: International Results – List of studied countries

Table 17 to Table 20 list the states and countries included in the global analysis of hybrid project potential, with statistics on the wholesale market price, the mean intra-daily spread in prices, and the range of mean annual wind and solar capacity factors (min-max), all during 2023. The currency for all wholesale prices was converted to GBP using the year-average market exchange rates (GBP 1 = 1.89 AUD = 1.27 USD = 1.16 EUR = 189 JPY). The geographical coordinates and capacity factors for all 252 modelled locations are given as a supplementary data file: `site\_metadata.csv`.

*Table 17: List of power markets studied in Europe, giving the mean wholesale price, the mean difference between maximum and minimum daily wholesale price, and the range of capacity factors for wind and solar (showing 1 standard deviation either side of the mean across the sites simulated within each market).*

| Name          | Code | Wholesale price (£/MWh) |              | Capacity factors |            |
|---------------|------|-------------------------|--------------|------------------|------------|
|               |      | Mean                    | Daily spread | Wind             | Solar      |
| Austria       | AT   | 87.84                   | 77.99        | 15.3-37.5%       | 15.2-16.2% |
| Belgium       | BE   | 83.40                   | 77.60        | 30.9-56.2%       | 14.1-15.6% |
| Bulgaria      | BG   | 89.77                   | 108.16       | 12.1-39.8%       | 18.1-19.4% |
| Cyprus        | CH   | 92.32                   | 54.51        | 5.7-19.2%        | 17.3-17.4% |
| Czechia       | CZ   | 86.30                   | 80.67        | 27.2-30.8%       | 14.4-16.7% |
| Denmark       | DK   | 72.12                   | 80.21        | 36.1-56.8%       | 13.1-15.1% |
| Estonia       | EE   | 77.83                   | 104.2        | 37.2-40.9%       | 13.2-13.7% |
| Finland       | FI   | 48.11                   | 65.57        | 23.4-30.5%       | 10.4-12.2% |
| France        | FR   | 83.13                   | 71.72        | 24.5-34.7%       | 15.4-18.7% |
| Germany       | DE   | 81.58                   | 83.54        | 22.9-34.0%       | 13.4-15.5% |
| Great Britain | GB   | 93.56                   | 81.80        | 34.3-49.8%       | 11.8-14.6% |
| Greece        | GR   | 103.11                  | 100.76       | 19.1-46.1%       | 17.9-22.3% |
| Hungary       | HR   | 89.21                   | 91.14        | 24.6-29.9%       | 16.5-17.8% |
| Ireland       | IE   | 103.57                  | 73.88        | 38.9-47.5%       | 12.0-13.1% |
| Italy         | IT   | 109.88                  | 65.67        | 23.3-35.5%       | 18.0-20.6% |
| Latvia        | LV   | 80.59                   | 103.44       | 26.2-37.4%       | 12.9-13.3% |
| Lithuania     | LT   | 81.09                   | 103.85       | 18.7-32.9%       | 12.9-13.4% |
| Netherlands   | NL   | 81.97                   | 91.60        | 37.0-37.9%       | 13.6-14.1% |
| Norway        | NO   | 50.73                   | 29.67        | 29.8-42.3%       | 7.9-11.5%  |
| Poland        | PL   | 95.96                   | 61.48        | 22.7-31.7%       | 13.5-14.4% |
| Portugal      | PT   | 77.58                   | 58.74        | 27.3-43.1%       | 18.2-21.0% |
| Romania       | RO   | 89.63                   | 108.72       | 22.5-36.3%       | 15.8-17.3% |
| Serbia        | RS   | 89.15                   | 84.22        | 26.9-31.2%       | 16.3-16.9% |
| Slovakia      | SK   | 90.08                   | 86.09        | 24.0-35.4%       | 15.2-15.9% |
| Slovenia      | SI   | 89.41                   | 82.88        | 23.3-23.7%       | 16.3-16.7% |
| Spain         | ES   | 77.15                   | 61.26        | 26.9-40.7%       | 19.2-21.2% |
| Sweden        | SE   | 44.61                   | 52.73        | 21.6-26.7%       | 11.4-13.1% |

*Table 18: List of power markets studied in the United States, following the same conventions as Table 17.*

| Name         | Code  | Wholesale price (£/MWh) |              | Capacity factors |            |
|--------------|-------|-------------------------|--------------|------------------|------------|
|              |       | Mean                    | Daily spread | Wind             | Solar      |
| California   | CAISO | 46.92                   | 59.67        | 18.8–27.4%       | 21.4–23.8% |
| Texas        | ERCOT | 44.01                   | 174.35       | 30.7–41.8%       | 20.3–23.2% |
| Midcontinent | MISO  | 22.80                   | 21.04        | 27.4–40.9%       | 18.6–20.4% |
| New York     | NYISO | 24.04                   | 19.77        | 22.9–31.9%       | 16.5–18.8% |
| Mid Atlantic | PJM   | 23.96                   | 26.06        | 21.8–31.2%       | 19.0–20.2% |

*Table 19: List of power markets studied in Australia, following the same conventions as Table 17.*

| Name            | Code | Wholesale price (£/MWh) |              | Capacity factors |            |
|-----------------|------|-------------------------|--------------|------------------|------------|
|                 |      | Mean                    | Daily spread | Wind             | Solar      |
| New South Wales | NSW  | 50.85                   | 211.31       | 25.1–33.3%       | 21.6–23.3% |
| Queensland      | QLD  | 48.05                   | 258.96       | 22.3–35.2%       | 22.4–23.3% |
| South Australia | SA   | 42.44                   | 287.99       | 36.0–45.1%       | 20.4–22.7% |
| Tasmania        | TAS  | 29.54                   | 75.28        | 35.6–47.3%       | 16.9–20.2% |
| Victoria        | VIC  | 29.03                   | 133.63       | 23.1–42.1%       | 18.7–21.3% |

*Table 20: List of power markets studied in Japan, following the same conventions as Table 17. Only one location was simulated per market zone, hence only the mean capacity factors are given. The Hokuriku power market was merged into Chubu and Kansai due to its small size; its power prices were almost perfectly correlated ( $R^2 > 0.99$ ) and it contains few large solar farms (and no wind farms).*

| Name     | Code | Wholesale price (£/MWh) |              | Capacity factors |       |
|----------|------|-------------------------|--------------|------------------|-------|
|          |      | Mean                    | Daily spread | Wind             | Solar |
| Chubu    | CB   | 65.84                   | 65.86        | 14.5%            | 20.4% |
| Chugoku  | CG   | 58.46                   | 68.62        | 26.1%            | 18.5% |
| Hokkaido | HK   | 66.93                   | 64.62        | 26.3%            | 17.0% |
| Kansai   | KS   | 58.76                   | 68.31        | 25.5%            | 18.8% |
| Kyushu   | KY   | 53.87                   | 75.63        | 19.7%            | 19.2% |
| Shikoku  | SK   | 57.69                   | 70.58        | 26.3%            | 19.4% |
| Tohoku   | TH   | 66.64                   | 62.98        | 25.4%            | 16.4% |
| Tokyo    | TK   | 71.15                   | 53.88        | 23.2%            | 18.7% |

## Appendix 14: Regional case studies

This section examines five regions with notable variations in hybrid project potential: Sweden, the UK, New South Wales (Australia), ERCOT (US), and PJM (US). Table 21 presents key market and production indicators for these areas.

*Table 21: Production indicators and electricity market characteristics in chosen regions*

|                                          | Sweden | UK    | NSW,<br>AUS | ERCOT,<br>US | PJM,<br>US |
|------------------------------------------|--------|-------|-------------|--------------|------------|
| <b>Average WS Market Price (£/MWh)</b>   | 44.44  | 93.57 | 50.92       | 55.92        | 30.32      |
| <b>Average Price Spread (£/MWh)</b>      | 28.87  | 40.25 | 104.7       | 213.4        | 14.77      |
| <b>Proportion of negative prices (%)</b> | 4.3    | 2.4   | 6.0         | 0            | 0          |
| <b>Solar Capacity Factor (%)</b>         | 13.2   | 15.2  | 22.4        | 21.4         | 19.9       |
| <b>Wind Capacity Factor (%)</b>          | 20.9   | 36.0  | 30.7        | 36.0         | 24.5       |
| <b>Solar Capture Rate (%)</b>            | 95.5   | 93.7  | 72.9        | 120.3        | 106.8      |
| <b>Wind Capture Rate (%)</b>             | 88.2   | 96.4  | 105.4       | 63.8         | 101.2      |
| <b>Grid Usage (%) - Solar</b>            | 12.95  | 14.9  | 22.0        | 21.0         | 19.6       |
| <b>Grid Usage (%) - Wind</b>             | 20.5   | 35.3  | 30.1        | 35.3         | 24.0       |

Regional differences are significant, with varying market prices and energy availability. For instance, Australia frequently sees negative prices, while US regions do not. Solar capacity factors range from 13.2% to 22.4%, affecting grid usage and capture rates. Table 22 provides a summary of the results found in Sections **Error! Reference source not found.** and **Error! Reference source not found.** specifically for these 5 areas.

Table 22: Summary of findings from international simulations for the case study regions

|                                                     | Sweden          | UK               | NSW,<br>AUS     | ERCOT,<br>US | PJM,<br>US      |
|-----------------------------------------------------|-----------------|------------------|-----------------|--------------|-----------------|
| <b>Full Hybrid project – Storage Optimisation</b>   |                 |                  |                 |              |                 |
| <b>Storage Capacity (MW)</b>                        | 0               | 0                | 120             | 120          | 0               |
| <b>Discharge Duration (hr)</b>                      | 4               | 4                | 2               | 4            | 4               |
| <b>Max. Storage CAPEX (£/MW)</b>                    | 260,000         | 440,000          | 940,000         | 1,380,000    | 100,000         |
| <b>Full Hybrid project – Renewable Optimisation</b> |                 |                  |                 |              |                 |
| <b>Solar Capacity (MW)</b>                          | 0               | 197              | 0               | 102          | 0               |
| <b>Wind Capacity (MW)</b>                           | 0               | 192              | 0               | 0            | 0               |
| <b>Market for PV+WIND+BESS</b>                      | Storage<br>Only | PV+WIND<br>+BESS | Storage<br>Only | PV+BESS      | Storage<br>Only |
| <b>Min. RES Fixed Price (£/MWh)</b>                 | 90              | 40               | 40              | 30           | 80              |
| <b>Co-located project – Renewable Optimisation</b>  |                 |                  |                 |              |                 |
| <b>Solar Capacity (MW)</b>                          | 150             | 150              | 0               | 50           | 150             |
| <b>Wind Capacity (MW)</b>                           | 50              | 0                | 0               | 0            | 50              |

For storage developers, co-locating with solar farms is viable in most regions, but wind co-location is less favourable except in Sweden and PJM, particularly when the renewable-to-grid ratio is low.

New South Wales and Texas are strong candidates for Full Hybrid project development compared to stand-alone renewable farms. However, in Australia, developers should prioritise stand-alone storage systems. In the US, Full Hybrid projects are beneficial with solar farms, but stand-alone storage is preferable for wind energy. In the UK, Full Hybrid projects present a promising opportunity for enhancing storage system revenues.

Figure 15 and Figure 16 illustrate energy flows and profit distribution in Full Hybrid projects with a 4-hour storage system and 100 MW solar asset. Energy traded correlates with regional price spreads, with negative prices impacting dynamics. For instance, ERCOT has a high price spread but less energy exchanged due to its lack of negative prices, unlike the UK.

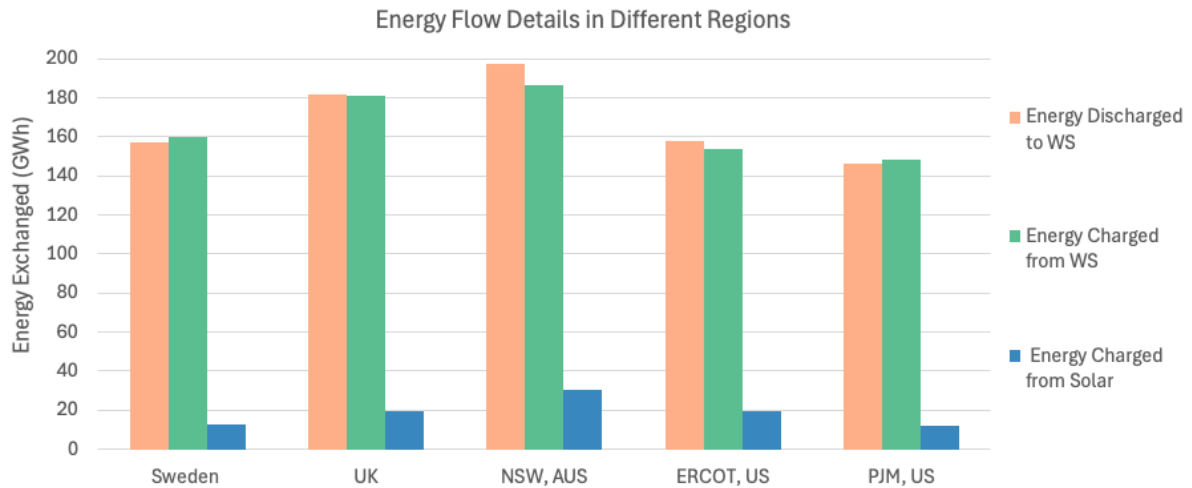

Figure 15: Energy flows of the storage system in solar full hybrid projects for each region

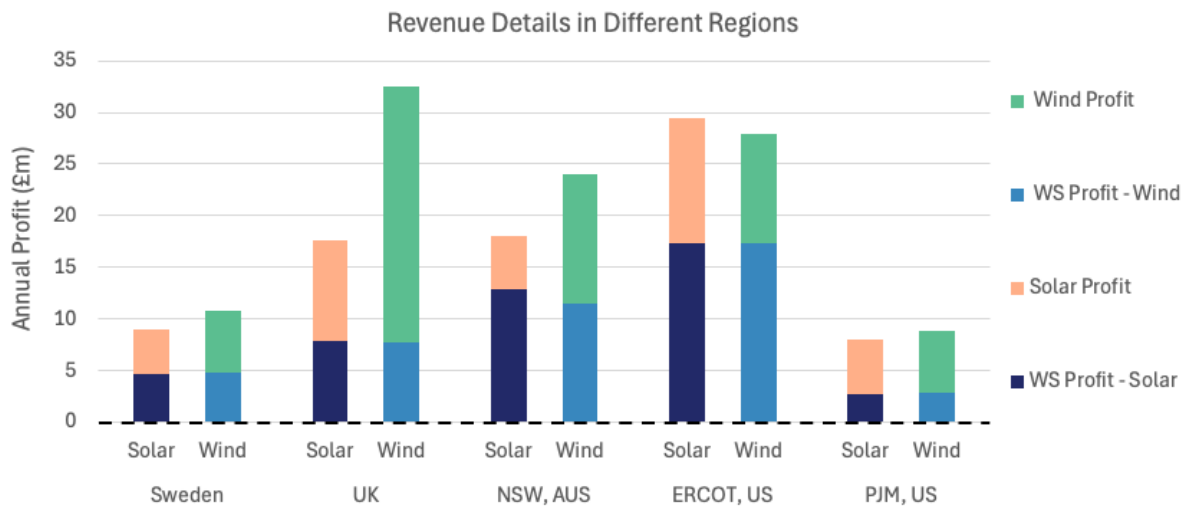

Figure 16: Repartition of profits between storage and renewables in full hybrid projects

Energy charged from solar varies by region. For example, only 7% of solar energy is stored in PJM, while 15.5% is stored in Australia. Higher solar capture rates typically mean less energy is stored, especially when price spreads are unfavourable. Conversely, Australia benefits from storage due to a high price spread and low capture rate, highlighting the region's hybrid project potential.

On average, adding a storage system boosts the capture rate by 4.6%, varying by region. Solar farms in PJM see a 2.7% increase, while ERCOT experiences a 9.8% rise. The storage system also enhances grid usage, with solar projects increasing by 31.6% and wind by 28.1% across all regions.

## Supplementary References

- 1 G. N. D. de Doile, P. R. Junior, L. C. S. Rocha, I. Bolis, K. Janda and L. M. C. Junior, *Energies (Basel)*., 2021, **14**, 6521.
- 2 Q. Hassan, S. Algburi, A. Z. Sameen, H. M. Salman and M. Jaszczur, *Results in Engineering*, 2023, **20**, 101621.
- 3 Osborne Clarke, Hybridisation of renewable energy generation installations raises regulatory issues in Spain, <https://www.osborneclarke.com/insights/hybridisation-renewable-energy-generation-installations-raises-regulatory-issues-spain>, (accessed 19 April 2024).
- 4 Ofgem, *Guidance for generators: Co-location of electricity storage and hydrogen production under the RO, FIT and SEG*, 2023.
- 5 Fluence Energy, Germany's Innovation Tender: Unleashing the Full Potential of Renewable and Storage Co-location, <https://blog.fluenceenergy.com/germany-innovation-tender-full-potential-renewable-storage-co-location>, (accessed 19 April 2024).
- 6 Pexapark, *Renewables-Plus-Storage Co-location Trends: Hybrid PPAs*, 2023.
- 7 M. Thirunavukkarasu, Y. Sawle and H. Lala, *Renewable and Sustainable Energy Reviews*, 2023, **176**, 113192.
- 8 A. H. Slama, S. Toumi, M. Saidi and L. Saidi, *2023 International Conference on Control, Automation and Diagnosis, ICCAD 2023*, DOI:10.1109/ICCAD57653.2023.10152341.
- 9 B. Bhandari, K. T. Lee, G. Y. Lee, Y. M. Cho and S. H. Ahn, *International Journal of Precision Engineering and Manufacturing - Green Technology*, 2015, **2**, 99–112.
- 10 A. A. Khan, A. F. Minai, R. K. Pachauri and H. Malik, *Energies 2022, Vol. 15, Page 6249*, 2022, **15**, 6249.
- 11 F. A. Khan, N. Pal and S. H. Saeed, *Renewable and Sustainable Energy Reviews*, 2018, **92**, 937–947.
- 12 A. H. Slama, M. Saidi and L. Saidi, *2022 IEEE International Conference on Electrical Sciences and Technologies in Maghreb, CISTEM 2022*, DOI:10.1109/CISTEM55808.2022.10043975.
- 13 B. S. Borowy and Z. M. Salameh, *IEEE Transactions on Energy Conversion*, 1996, **11**, 367–373.
- 14 M. Ji, W. Zhang, Y. Xu, Q. Liao, J. Jaromír Klemeš and B. Wang, *Energy Convers. Manag.*, 2023, **281**, 116826.
- 15 M. Engin, *International Journal of Photoenergy*, 2013, **2013**, 217526.

- 16 C. E. C. Nogueira, M. L. Vidotto, R. K. Niedzialkoski, S. N. M. De Souza, L. I. Chaves, T. Edwiges, D. B. Dos Santos and I. Werncke, *Renewable and Sustainable Energy Reviews*, 2014, **29**, 151–157.
- 17 A. Gupta, R. P. Saini and M. P. Sharma, *Renew. Energy*, 2010, **35**, 520–535.
- 18 N. Pradhan and N. R. Karki, *2012 North American Power Symposium, NAPS 2012*, DOI:10.1109/NAPS.2012.6336317.
- 19 A. G. Bakirtzis, *IEEE Transactions on Energy Conversion*, 1992, **7**, 99–107.
- 20 H. X. Yang, L. Lu and J. Burnett, *Renew. Energy*, 2003, **28**, 1813–1824.
- 21 G. Tina and S. Gagliano, *Int. J. Energy Res.*, 2011, **35**, 221–232.
- 22 S. Şevik, *Int. J. Hydrogen Energy*, 2022, **47**, 23935–23956.
- 23 S. Diaf, G. Notton, M. Belhamel, M. Haddadi and A. Louche, *Appl. Energy*, 2008, **85**, 968–987.
- 24 M. Egido and E. Lorenzo, *Solar Energy Materials and Solar Cells*, 1992, **26**, 51–69.
- 25 A. Madhlopa, D. Sparks, S. Keen, M. Moorlach, P. Krog and T. Dlamini, *Renewable and Sustainable Energy Reviews*, 2015, **47**, 324–331.
- 26 R. Dufo-López, J. L. Bernal-Agustín and F. Mendoza, *Energy Policy*, 2009, **37**, 3082–3095.
- 27 J. K. Kaldellis, D. Zafirakis and E. Kondili, *Energy*, 2009, **34**, 1187–1198.
- 28 P. Gabrielli, F. Furer, G. Mavromatidis and M. Mazzotti, *Appl. Energy*, 2019, **238**, 1192–1210.
- 29 P. Gabrielli, M. Gazzani, E. Martelli and M. Mazzotti, *Appl. Energy*, 2018, **219**, 408–424.
- 30 I. Staffell and S. Pfenninger, *Energy*, 2016, **114**, 1224–1239.
- 31 S. Pfenninger and I. Staffell, *Energy*, 2016, **114**, 1251–1265.
- 32 O. Schmidt and I. Staffell, *Monetizing Energy Storage*, Oxford University Press, Oxford, UK, 2023.
- 33 National Grid, Dynamic Containment Masterdata - ESO, [https://www.nationalgrideso.com/data-portal/dynamic-containment-data/dynamic\\_containment\\_masterdata](https://www.nationalgrideso.com/data-portal/dynamic-containment-data/dynamic_containment_masterdata), (accessed 29 August 2024).
- 34 Modo Energy, Live Detailed System Prices, [https://modoenergy.com/data/plotter/great-britain?end\\_date=2024-08-29&fields=%255B%2522DISEBSP.systemSellPrice%2522%252C%2522NordPoolPrice.price%2522%252C%2522RTRPDHHLatest.rpd\\_hh%2522%252C%2522BatteryRevenueBreakdown.hourly\\_revenue\\_permw%2522%255D&period=1D&start\\_date=2024-08-28](https://modoenergy.com/data/plotter/great-britain?end_date=2024-08-29&fields=%255B%2522DISEBSP.systemSellPrice%2522%252C%2522NordPoolPrice.price%2522%252C%2522RTRPDHHLatest.rpd_hh%2522%252C%2522BatteryRevenueBreakdown.hourly_revenue_permw%2522%255D&period=1D&start_date=2024-08-28), (accessed 29 August 2024).
- 35 F. Lo Franco, A. Morandi, P. Raboni and G. Grandi, *Energies 2021, Vol. 14, Page 4823*, 2021, **14**, 4823.

- 36 EIA, Annual Energy Outlook 2021, [https://www.eia.gov/outlooks/aeo/tables\\_side.php](https://www.eia.gov/outlooks/aeo/tables_side.php), (accessed 29 August 2024).
- 37 H. C. Hesse, R. Martins, P. Musilek, M. Naumann, C. N. Truong and A. Jossen, *Energies* 2017, Vol. 10, Page 835, 2017, **10**, 835.
- 38 D. M. Rosewater, D. A. Copp, T. A. Nguyen, R. H. Byrne and S. Santoso, *IEEE Access*, 2019, **7**, 178357–178391.
- 39 L. Hatton, N. Johnson, L. Dixon, B. Mosongo, S. De Kock, A. Marquard, M. Howells and I. Staffell, *Data Brief*, 2024, **55**, 110669.
- 40 F. Fan, G. Zorzi, D. Campos-Gaona, G. Burt, O. Anaya-Lara, J. Nwobu and A. Madariaga, *Energies* 2021, Vol. 14, Page 1439, 2021, **14**, 1439.
- 41 V. Delapedra-Silva, P. Ferreira, J. Cunha and H. Kimura, *Processes* 2022, Vol. 10, Page 184, 2022, **10**, 184.
